# Supplementary material for: Computational study on novel RhCpX (X = CF3, SiF3, CCl3, SO3H) as promising catalysts in the [3 + 2] azide–alkyne cycloaddition reaction: insights into mechanistic pathways and reactivity
Source: Royal Society of Chemistry journal article supplement (doi:10.1039/d4dt02970d), 2025-01-01

## Computational Study on Novel RhCp<sup>X</sup> (X = CF<sub>3</sub>, SiF<sub>3</sub>, CCl<sub>3</sub>, SO<sub>3</sub>H) as Promising Catalysts in the [3+2] Azide–Alkyne Cycloaddition Reaction: Insights into Mechanistic Pathways and Reactivity

Ali A Khairbek<sup>1,8</sup>, Mohammad Abd-Al Hakim Badawi<sup>2</sup>, Abdullah Y. Alzahrani<sup>3</sup>, Ralph Puchta<sup>4,5,6</sup> and Renjith Thomas<sup>7,8</sup>

<sup>1</sup> Centre of Molecular Medicine and Diagnostics (COMManD), Saveetha Dental College and Hospitals, Saveetha Institute of Medical and Technical Sciences, Saveetha University, Chennai 600 077, India

<sup>2</sup> Department of Chemistry, Faculty of Science, Tishreen University, Latakia, Syrian Arab Republic.

<sup>3</sup> Department of Chemistry, Faculty of Science and Arts, King Khalid University, Mohail Assir, Saudi Arabia;

<sup>4</sup> Inorganic Chemistry, Department of Chemistry and Pharmacy, University of Erlangen-Nuremberg, Erlangen, Germany

<sup>5</sup> Computer Chemistry Center, Department of Chemistry and Pharmacy, University of Erlangen-Nuremberg, Erlangen, Germany

<sup>6</sup> Central Institute for Scientific Computing (CISC), University of Erlangen-Nuremberg, Erlangen, Germany

<sup>7</sup> Department of Chemistry, St Berchmans College (Autonomous), Changanassery, Kerala, India-686101.

<sup>8</sup> Centre for Theoretical and Computational Chemistry, St Berchmans College (Autonomous), Changanassery, Kerala, India-686101.

Corresponding Authors:

**Ali A Khairbek MRSC:** [alikhairbek@gmail.com](mailto:alikhairbek@gmail.com)

**Renjith Thomas FRSC:** [renjith@sbccollege.ac.in](mailto:renjith@sbccollege.ac.in)

### NCI and RDG Analysis

To gain a comprehensive understanding of the catalytic behavior of the RhCp<sup>X</sup> complexes, we first focus on the analysis of the Cp<sup>X</sup> ligands themselves. Using Non-Covalent Interaction (NCI) and Reduced Density Gradient (RDG) analyses, we investigate the stability and interaction patterns of the Cp<sup>X</sup> ligands, which play a key role in modulating the reactivity of the catalyst. These initial insights into the ligand interactions pave the way for a detailed mechanistic exploration of the [3+2] azide-alkyne cycloaddition reaction.

NCI and RDG analyses are powerful computational tools used to visualize and quantify weak interactions in molecular systems<sup>35–38</sup>. NCI provides a detailed map of noncovalent interactions such as hydrogen bonds, van der Waals forces, and repulsive steric effects by analyzing electron density regions. RDG complements this by identifying regions of low

electron density gradients, which correspond to noncovalent interactions, and characterizing them on the basis of their strength. Together, the NCI and RDG plots offer valuable insights into the stability and behavior of molecular complexes, aiding in the understanding of their molecular structures and reactivities. These methods are especially useful for studying weak interactions in both small molecules and complex systems.

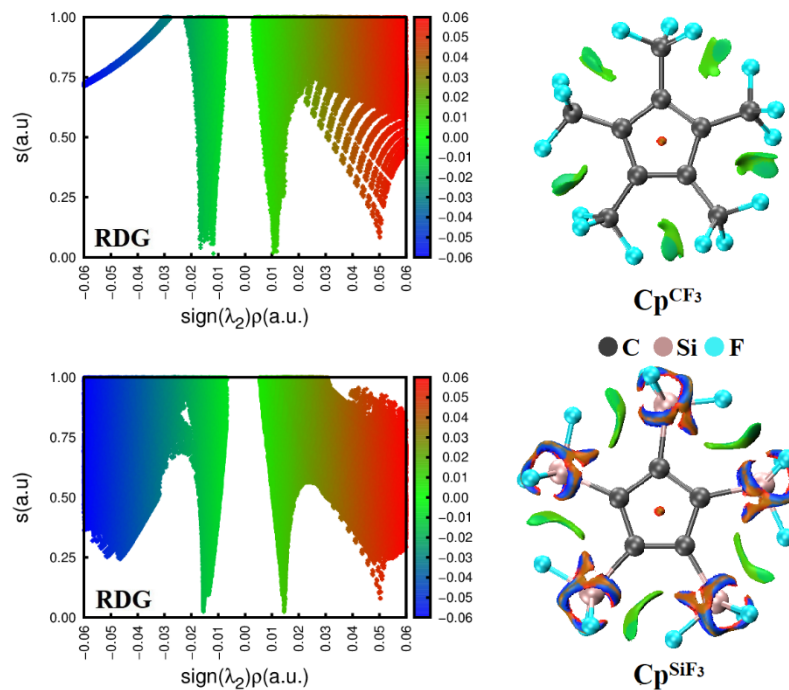

Figure S1. RDG and NCI plots for  $\text{Cp}^{\text{CF}_3}$  and  $\text{Cp}^{\text{SiF}_3}$ .

The RDG and NCI plots for the ligands  $\text{Cp}^{\text{CF}_3}$  and  $\text{Cp}^{\text{SiF}_3}$  were analyzed to assess their stability on the basis of their noncovalent interactions (Figure S1). The  $\text{Cp}^{\text{CF}_3}$  ligand demonstrated moderate stability, primarily due to the weak interactions observed around the fluorine atoms. The RDG plots reveal some red regions, which indicate weak repulsive interactions, limiting the overall stability of the ligand. Although van der Waals forces contribute to its structure, the absence of strong attractive forces reduces its effectiveness in more reactive or demanding environments. In contrast, the  $\text{Cp}^{\text{SiF}_3}$  ligand exhibited better stability. The RDG and NCI plots highlight strong attractive interactions between the fluorine and silicon atoms, evident from the blue and green regions, which signify favorable noncovalent attractions. These interactions strengthen the ligand's structure, ensuring more robust stability under various conditions. On the other hand,  $\text{Cp}^{\text{CCl}_3}$  relies heavily on weak van der Waals forces, as indicated by the peaks near zero in the RDG plots in Figure S2. These weak interactions around the chlorine atoms suggest limited stability, as the ligand lacks significant attractive forces to hold its structure firmly in place. The absence of blue or green regions in the NCI plots further supports the conclusion that  $\text{Cp}^{\text{CCl}_3}$  has reduced stability compared with other ligands. Finally,  $\text{Cp}^{\text{SO}_3\text{H}}$  displays the highest stability among the four ligands. The RDG plots show distinct blue and green regions, indicating strong hydrogen bonding between the oxygen and sulfur atoms. These attractive interactions provide a solid foundation for the ligand's structure, making it the most stable in terms of noncovalent interactions.

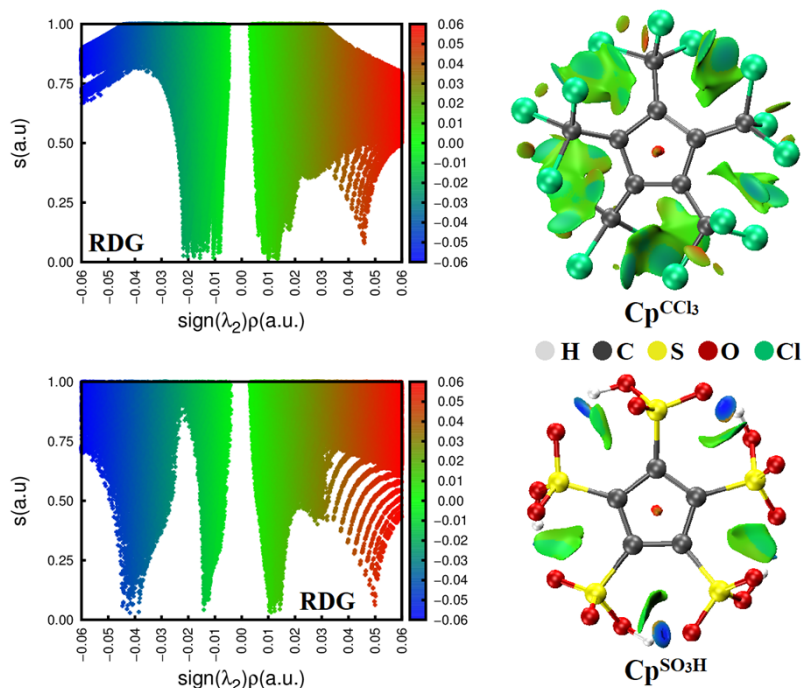

Figure S2. RDG and NCI plots for  $\text{Cp}^{\text{CCl}_3}$  and  $\text{Cp}^{\text{SO}_3\text{H}}$ .

$\text{Cp}^{\text{CF}_3}$  and  $\text{Cp}^{\text{CCl}_3}$  demonstrate moderate to weak stability because of their reliance on weak interactions.  $\text{Cp}^{\text{SiF}_3}$  and  $\text{Cp}^{\text{SO}_3\text{H}}$  show greater stability because of the strong noncovalent attractions that enhance their molecular structure.

Table S1:  $\Delta G_{298}$  (kcal/mol) in the gas phase and solvents for the  $\text{Cp}^{\text{CF}_3}$  in 1-4 pathways.

| $\text{Cp}^{\text{CF}_3}$ |           |         |       |             |         |              |       |
|---------------------------|-----------|---------|-------|-------------|---------|--------------|-------|
| $\Delta G_{298}$          | gas phase | Toluene | THF   | Cyclohexane | benzene | Acetonitrile | water |
| $\text{RC}_{1-4}$         | -4.4      | -3.0    | -2.3  | -3.2        | -3.0    | -2.0         | -2.0  |
| $\text{TS1}_{1-4}$        | 11.0      | 12.2    | 12.8  | 12.0        | 12.2    | 13.1         | 13.1  |
| $\text{IC}_{1-4}$         | -26.2     | -25.3   | -25.0 | -25.4       | -25.4   | -24.9        | -24.9 |
| $\text{TS2}_{1-4}$        | 9.8       | 10.3    | 10.5  | 10.3        | 10.3    | 10.5         | 10.5  |
| $\text{P}_{1-4}$          | -52.6     | -53.3   | -53.8 | -53.1       | -53.2   | -54.1        | -54.2 |

Table S2:  $\Delta G_{298}$  (kcal/mol) in the gas phase and solvents for the  $\text{Cp}^{\text{SiF}_3}$  in 1-4 pathways.

| $\text{Cp}^{\text{SiF}_3}$ |           |         |       |             |         |              |       |
|----------------------------|-----------|---------|-------|-------------|---------|--------------|-------|
| $\Delta G_{298}$           | gas phase | Toluene | THF   | Cyclohexane | benzene | Acetonitrile | water |
| $\text{RC}_{1-4}$          | -4.6      | -2.5    | -1.4  | -2.8        | -2.6    | -1.0         | -1.0  |
| $\text{TS1}_{1-4}$         | 12.6      | 14.4    | 15.2  | 14.1        | 14.3    | 15.6         | 15.6  |
| $\text{IC}_{1-4}$          | -25.4     | -24.1   | -23.6 | -24.3       | -24.2   | -23.5        | -23.5 |
| $\text{TS2}_{1-4}$         | 8.5       | 9.8     | 10.4  | 9.7         | 9.8     | 10.5         | 10.6  |
| $\text{P}_{1-4}$           | -55.8     | -55.5   | -55.5 | -55.5       | -55.5   | -55.5        | -55.5 |

Table S3:  $\Delta G_{298}$  (kcal/mol) in the gas phase and solvents for the  $Cp^{CCl_3}$  in 1-4 pathways.

| $Cp^{CCl_3}$       |           |         |       |             |         |              |       |
|--------------------|-----------|---------|-------|-------------|---------|--------------|-------|
| $\Delta G_{298}$   | gas phase | Toluene | THF   | Cyclohexane | benzene | Acetonitrile | water |
| RC <sub>1-4</sub>  | 2.4       | 3.1     | 3.4   | 3.0         | 3.1     | 3.5          | 3.5   |
| TS1 <sub>1-4</sub> | 16.3      | 17.5    | 18.2  | 17.4        | 17.5    | 18.4         | 18.5  |
| IC <sub>1-4</sub>  | -24.7     | -23.9   | -23.5 | -24.0       | -23.9   | -23.4        | -23.4 |
| TS2 <sub>1-4</sub> | 11.7      | 12.0    | 12.0  | 12.0        | 12.0    | 12.0         | 12.0  |
| P <sub>1-4</sub>   | -45.9     | -47.6   | -48.8 | -47.3       | -47.5   | -49.3        | -49.4 |

Table S4:  $\Delta G_{298}$  (kcal/mol) in the gas phase and solvents for the  $Cp^{SO_3H}$  in 1-4 pathways.

| $Cp^{SO_3H}$       |           |         |       |             |         |              |       |
|--------------------|-----------|---------|-------|-------------|---------|--------------|-------|
| $\Delta G_{298}$   | gas phase | Toluene | THF   | Cyclohexane | benzene | Acetonitrile | water |
| RC <sub>1-4</sub>  | -7.9      | -5.0    | -3.3  | -5.4        | -5.1    | -2.7         | -2.6  |
| TS1 <sub>1-4</sub> | 5.1       | 8.3     | 10.0  | 7.8         | 8.1     | 10.7         | 10.8  |
| IC <sub>1-4</sub>  | -28.7     | -26.3   | -25.1 | -26.6       | -26.4   | -24.6        | -24.6 |
| TS2 <sub>1-4</sub> | -6.6      | -4.4    | -3.3  | -4.7        | -4.5    | -2.9         | -2.9  |
| P <sub>1-4</sub>   | -59.6     | -60.2   | -60.6 | -60.1       | -60.2   | -60.7        | -60.7 |

Table S5:  $\Delta G_{298}$  (kcal/mol) in the gas phase and solvents for the  $Cp^{CF_3}$  in 1-5 pathways.

| $Cp^{CF_3}$        |           |         |       |             |         |              |       |
|--------------------|-----------|---------|-------|-------------|---------|--------------|-------|
| $\Delta G_{298}$   | gas phase | Toluene | THF   | Cyclohexane | benzene | Acetonitrile | water |
| RC <sub>1-5</sub>  | -5.4      | -3.8    | -2.9  | -4.0        | -3.8    | -2.6         | -2.6  |
| TS1 <sub>1-5</sub> | 7.6       | 9.3     | 10.2  | 9.0         | 9.2     | 10.5         | 10.6  |
| IC <sub>1-5</sub>  | -8.0      | -7.8    | -7.9  | -7.8        | -7.8    | -7.9         | -7.9  |
| TS2 <sub>1-5</sub> | -3.6      | -3.2    | -3.1  | -3.2        | -3.2    | -3.1         | -3.1  |
| P <sub>1-5</sub>   | -29.0     | -36.3   | -41.1 | -35.2       | -36.0   | -43.3        | -43.6 |

Table S6:  $\Delta G_{298}$  (kcal/mol) in the gas phase and solvents for the  $Cp^{SiF_3}$  in 1-5 pathways.

| $Cp^{SiF_3}$       |           |         |       |             |         |              |       |
|--------------------|-----------|---------|-------|-------------|---------|--------------|-------|
| $\Delta G_{298}$   | gas phase | Toluene | THF   | Cyclohexane | benzene | Acetonitrile | water |
| RC <sub>1-5</sub>  | -5.1      | -2.8    | -1.6  | -3.1        | -2.9    | -1.1         | -1.1  |
| TS1 <sub>1-5</sub> | 4.5       | 7.0     | 8.3   | 6.6         | 6.9     | 8.8          | 8.9   |
| IC <sub>1-5</sub>  | -7.4      | -6.9    | -6.7  | -6.9        | -6.9    | -6.7         | -6.7  |
| TS2 <sub>1-5</sub> | -2.2      | -1.7    | -1.7  | -1.8        | -1.7    | -1.7         | -1.7  |
| P <sub>1-5</sub>   | -34.4     | -37.9   | -40.3 | -37.4       | -37.8   | -41.3        | -41.5 |

Table S7:  $\Delta G_{298}$  (kcal/mol) in the gas phase and solvents for the  $Cp^{CCl_3}$  in 1-5 pathways.

| $\Delta G_{298}$   | $Cp^{CCl_3}$ |         |       |             |         |              |       |
|--------------------|--------------|---------|-------|-------------|---------|--------------|-------|
|                    | gas phase    | Toluene | THF   | Cyclohexane | benzene | Acetonitrile | water |
| RC <sub>1-5</sub>  | 5.6          | 6.3     | 6.5   | 6.2         | 6.2     | 6.6          | 6.7   |
| TS1 <sub>1-5</sub> | 11.8         | 12.9    | 13.5  | 12.7        | 12.8    | 13.7         | 13.7  |
| IC <sub>1-5</sub>  | -2.4         | -3.2    | -3.9  | -3.1        | -3.2    | -4.2         | -4.2  |
| TS2 <sub>1-5</sub> | 2.5          | 2.4     | 2.3   | 2.4         | 2.4     | 2.2          | 2.2   |
| P <sub>1-5</sub>   | -58.5        | -62.6   | -65.4 | -62.0       | -62.5   | -66.6        | -66.8 |

Table S8:  $\Delta G_{298}$  (kcal/mol) in the gas phase and solvents for the  $Cp^{SO_3H}$  in 1-5 pathways.

| $\Delta G_{298}$   | $Cp^{SO_3H}$ |         |       |             |         |              |       |
|--------------------|--------------|---------|-------|-------------|---------|--------------|-------|
|                    | gas phase    | Toluene | THF   | Cyclohexane | benzene | Acetonitrile | water |
| RC <sub>1-5</sub>  | -9.2         | -6.9    | -5.7  | -7.2        | -7.0    | -5.2         | -5.2  |
| TS1 <sub>1-5</sub> | 0.2          | 3.3     | 4.9   | 2.8         | 3.1     | 5.6          | 5.7   |
| IC <sub>1-5</sub>  | -14.7        | -13.0   | -12.2 | -13.2       | -13.1   | -12.0        | -11.9 |
| TS2 <sub>1-5</sub> | -7.2         | -5.7    | -5.1  | -5.9        | -5.8    | -4.9         | -4.9  |
| P <sub>1-5</sub>   | -49.0        | -56.8   | -62.0 | -55.6       | -56.5   | -64.3        | -64.6 |

Table S9.  $G_{\text{corr}}$  in the gas phase and ( $E_o$ ) in the solvent (in Hartree) of catalytic cycle components with  $Cp^{CF_3}$ , for 1,4 RhAAC reaction pathways.

|                    | $Cp^{CF_3}$                |                        |                             |                      |
|--------------------|----------------------------|------------------------|-----------------------------|----------------------|
|                    | $G_o_{\text{GAS}}$         | $E_o_{\text{GAS}}$     | $E_o_{\text{Toluene}}$      | $E_o_{\text{THF}}$   |
| AC                 | 0.162202                   | -2293.726625           | -2293.731588                | -2293.734230         |
| RC <sub>1-4</sub>  | 0.286952                   | -2728.151960           | -2728.157989                | -2728.161277         |
| TS1 <sub>1-4</sub> | 0.287372                   | -2728.127977           | -2728.134194                | -2728.137589         |
| IC <sub>1-4</sub>  | 0.294852                   | -2728.194676           | -2728.201504                | -2728.205328         |
| TS2 <sub>1-4</sub> | 0.291947                   | -2728.134426           | -2728.141787                | -2728.145940         |
| P <sub>1-4</sub>   | 0.293015                   | -2728.234925           | -2728.244147                | -2728.249470         |
|                    | $E_o_{\text{Cyclohexane}}$ | $E_o_{\text{benzene}}$ | $E_o_{\text{Acetonitrile}}$ | $E_o_{\text{Water}}$ |
| AC                 | -2293.730920               | -2293.731415           | -2293.731415                | -2293.735397         |
| RC <sub>1-4</sub>  | -2728.157168               | -2728.157777           | -2728.157777                | -2728.162749         |
| TS1 <sub>1-4</sub> | -2728.133347               | -2728.133975           | -2728.133975                | -2728.139111         |
| IC <sub>1-4</sub>  | -2728.200562               | -2728.201260           | -2728.201260                | -2728.207074         |
| TS2 <sub>1-4</sub> | -2728.140767               | -2728.141523           | -2728.141523                | -2728.147841         |
| P <sub>1-4</sub>   | -2728.242853               | -2728.243811           | -2728.243811                | -2728.251938         |

Table S10.  $G_{\text{corr}}$  in the gas phase and ( $E_o$ ) in the solvent (in Hartree) of catalytic cycle components with  $Cp^{SiF_3}$ , for 1,4 RhAAC reaction pathways.

| $Cp^{SiF_3}$       |                            |                        |                             |                      |
|--------------------|----------------------------|------------------------|-----------------------------|----------------------|
|                    | $G_o_{\text{GAS}}$         | $E_o_{\text{GAS}}$     | $E_o_{\text{Toluene}}$      | $E_o_{\text{THF}}$   |
| AC                 | 0.128667                   | -3551.269209           | -3551.279065                | -3551.284276         |
| RC <sub>1-4</sub>  | 0.252740                   | -3985.694194           | -3985.704002                | -3985.709261         |
| TS1 <sub>1-4</sub> | 0.257379                   | -3985.671463           | -3985.681775                | -3985.687339         |
| IC <sub>1-4</sub>  | 0.262193                   | -3985.736853           | -3985.747931                | -3985.754081         |
| TS2 <sub>1-4</sub> | 0.259030                   | -3985.679618           | -3985.690665                | -3985.696768         |
| P <sub>1-4</sub>   | 0.260945                   | -3985.784047           | -3985.796637                | -3985.803560         |
|                    | $E_o_{\text{Cyclohexane}}$ | $E_o_{\text{benzene}}$ | $E_o_{\text{Acetonitrile}}$ | $E_o_{\text{Water}}$ |
| AC                 | -3551.277745               | -3551.278724           | -3551.278724                | -3551.286570         |
| RC <sub>1-4</sub>  | -3985.702679               | -3985.703660           | -3985.703660                | -3985.711595         |
| TS1 <sub>1-4</sub> | -3985.680379               | -3985.681414           | -3985.681414                | -3985.689821         |
| IC <sub>1-4</sub>  | -3985.746410               | -3985.747537           | -3985.747537                | -3985.756879         |
| TS2 <sub>1-4</sub> | -3985.689152               | -3985.690273           | -3985.690273                | -3985.699531         |
| P <sub>1-4</sub>   | -3985.794917               | -3985.796192           | -3985.796192                | -3985.806682         |

Table S11.  $G_{\text{corr}}$  in the gas phase and ( $E_o$ ) in the solvent (in Hartree) of catalytic cycle components with  $Cp^{CCl_3}$ , for 1,4 RhAAC reaction pathways.

| $Cp^{CCl_3}$       |                            |                        |                             |                      |
|--------------------|----------------------------|------------------------|-----------------------------|----------------------|
|                    | $G_o_{\text{GAS}}$         | $E_o_{\text{GAS}}$     | $E_o_{\text{Toluene}}$      | $E_o_{\text{THF}}$   |
| AC                 | 0.123480                   | -7697.305251           | -7697.309339                | -7697.311523         |
| RC <sub>1-4</sub>  | 0.249982                   | -8131.721629           | -8131.727808                | -8131.731216         |
| TS1 <sub>1-4</sub> | 0.251884                   | -8131.701342           | -8131.706671                | -8131.709569         |
| IC <sub>1-4</sub>  | 0.254438                   | -8131.769266           | -8131.775272                | -8131.778630         |
| TS2 <sub>1-4</sub> | 0.256469                   | -8131.713194           | -8131.720073                | -8131.723951         |
| P <sub>1-4</sub>   | 0.257800                   | -8131.806366           | -8131.816368                | -8131.822224         |
|                    | $E_o_{\text{Cyclohexane}}$ | $E_o_{\text{benzene}}$ | $E_o_{\text{Acetonitrile}}$ | $E_o_{\text{Water}}$ |
| AC                 | -7697.308789               | -7697.309197           | -7697.309197                | -7697.312490         |
| RC <sub>1-4</sub>  | -8131.726962               | -8131.727589           | -8131.727589                | -8131.732754         |
| TS1 <sub>1-4</sub> | -8131.705947               | -8131.706484           | -8131.706484                | -8131.710865         |
| IC <sub>1-4</sub>  | -8131.774445               | -8131.775058           | -8131.775058                | -8131.780164         |
| TS2 <sub>1-4</sub> | -8131.719120               | -8131.719826           | -8131.719826                | -8131.725727         |
| P <sub>1-4</sub>   | -8131.814956               | -8131.816001           | -8131.816001                | -8131.824970         |

Table S12.  $G_{\text{corr}}$  in the gas phase and ( $E_o$ ) in the solvent (in Hartree) of catalytic cycle components with  $Cp^{SO_3H}$ , for 1,4 RhAAC reaction pathways.

| $Cp^{SO_3H}$       |                           |                       |                            |                     |
|--------------------|---------------------------|-----------------------|----------------------------|---------------------|
|                    | $Go_{\text{GAS}}$         | $Eo_{\text{GAS}}$     | $Eo_{\text{Toluene}}$      | $Eo_{\text{THF}}$   |
| AC                 | 0.214747                  | -3727.022047          | -3727.037250               | -3727.045527        |
| RC <sub>1-4</sub>  | 0.338453                  | -4161.451950          | -4161.465765               | -4161.473187        |
| TS1 <sub>1-4</sub> | 0.340499                  | -4161.433256          | -4161.446725               | -4161.453961        |
| IC <sub>1-4</sub>  | 0.346972                  | -4161.493601          | -4161.508247               | -4161.516329        |
| TS2 <sub>1-4</sub> | 0.348124                  | -4161.459567          | -4161.474557               | -4161.482838        |
| P <sub>1-4</sub>   | 0.343664                  | -4161.539561          | -4161.558971               | -4161.569588        |
|                    | $Eo_{\text{Cyclohexane}}$ | $Eo_{\text{benzene}}$ | $Eo_{\text{Acetonitrile}}$ | $Eo_{\text{Water}}$ |
| AC                 | -3727.035184              | -3727.036716          | -3727.036716               | -3727.049239        |
| RC <sub>1-4</sub>  | -4161.463900              | -4161.465283          | -4161.465283               | -4161.476489        |
| TS1 <sub>1-4</sub> | -4161.444907              | -4161.446255          | -4161.446255               | -4161.457182        |
| IC <sub>1-4</sub>  | -4161.506245              | -4161.507728          | -4161.507728               | -4161.520000        |
| TS2 <sub>1-4</sub> | -4161.472506              | -4161.474026          | -4161.474026               | -4161.486597        |
| P <sub>1-4</sub>   | -4161.556325              | -4161.558286          | -4161.558286               | -4161.574356        |

Table S13.  $G_{\text{corr}}$  in the gas phase and ( $E_o$ ) in the solvent (in Hartree) of catalytic cycle components with  $Cp^{CF_3}$ , for 1,5 RhAAC reaction pathways.

| $Cp^{CF_3}$        |                           |                       |                            |                     |
|--------------------|---------------------------|-----------------------|----------------------------|---------------------|
|                    | $Go_{\text{GAS}}$         | $Eo_{\text{GAS}}$     | $Eo_{\text{Toluene}}$      | $Eo_{\text{THF}}$   |
| AC                 | 0.162202                  | -2293.726625          | -2293.731588               | -2293.734230        |
| RC <sub>1-5</sub>  | 0.285427                  | -2728.152049          | -2728.157710               | -2728.160756        |
| TS1 <sub>1-5</sub> | 0.289855                  | -2728.135815          | -2728.141342               | -2728.144314        |
| IC <sub>1-5</sub>  | 0.290378                  | -2728.161159          | -2728.169070               | -2728.173578        |
| TS2 <sub>1-5</sub> | 0.291445                  | -2728.155267          | -2728.162788               | -2728.167032        |
| P <sub>1-5</sub>   | 0.292128                  | -2728.196413          | -2728.216179               | -2728.228352        |
|                    | $Eo_{\text{Cyclohexane}}$ | $Eo_{\text{benzene}}$ | $Eo_{\text{Acetonitrile}}$ | $Eo_{\text{Water}}$ |
| AC                 | -2293.730920              | -2293.731415          | -2293.731415               | -2293.735397        |
| RC <sub>1-5</sub>  | -2728.156945              | -2728.157512          | -2728.157512               | -2728.162110        |
| TS1 <sub>1-5</sub> | -2728.140595              | -2728.141149          | -2728.141149               | -2728.145634        |
| IC <sub>1-5</sub>  | -2728.167968              | -2728.168784          | -2728.168784               | -2728.175653        |
| TS2 <sub>1-5</sub> | -2728.161746              | -2728.162518          | -2728.162518               | -2728.168977        |
| P <sub>1-5</sub>   | -2728.213315              | -2728.215432          | -2728.215432               | -2728.234234        |

Table S14.  $G_{\text{corr}}$  in the gas phase and ( $E_o$ ) in the solvent (in Hartree) of catalytic cycle components with  $Cp^{SiF_3}$ , for 1,4 RhAAC reaction pathways.

| $Cp^{SiF_3}$       |                           |                       |                            |                     |
|--------------------|---------------------------|-----------------------|----------------------------|---------------------|
|                    | $Go_{\text{GAS}}$         | $Eo_{\text{GAS}}$     | $Eo_{\text{Toluene}}$      | $Eo_{\text{THF}}$   |
| AC                 | 0.128667                  | -3551.269209          | -3551.279065               | -3551.284276        |
| RC <sub>1-5</sub>  | 0.252959                  | -3985.695197          | -3985.704691               | -3985.709735        |
| TS1 <sub>1-5</sub> | 0.255171                  | -3985.682251          | -3985.691356               | -3985.696180        |
| IC <sub>1-5</sub>  | 0.258031                  | -3985.704090          | -3985.716251               | -3985.722989        |
| TS2 <sub>1-5</sub> | 0.257396                  | -3985.695121          | -3985.707434               | -3985.714330        |
| P <sub>1-5</sub>   | 0.260448                  | -3985.749444          | -3985.768112               | -3985.778860        |
|                    | $Eo_{\text{Cyclohexane}}$ | $Eo_{\text{benzene}}$ | $Eo_{\text{Acetonitrile}}$ | $Eo_{\text{Water}}$ |
| AC                 | -3551.277745              | -3551.278724          | -3551.278724               | -3551.286570        |
| RC <sub>1-5</sub>  | -3985.703416              | -3985.704362          | -3985.704362               | -3985.711962        |
| TS1 <sub>1-5</sub> | -3985.690136              | -3985.691041          | -3985.691041               | -3985.698306        |
| IC <sub>1-5</sub>  | -3985.714583              | -3985.715819          | -3985.715819               | -3985.726041        |
| TS2 <sub>1-5</sub> | -3985.705736              | -3985.706994          | -3985.706994               | -3985.717482        |
| P <sub>1-5</sub>   | -3985.765502              | -3985.767434          | -3985.767434               | -3985.783867        |

Table S15.  $G_{\text{corr}}$  in the gas phase and ( $E_o$ ) in the solvent (in Hartree) of catalytic cycle components with  $Cp^{CCl_3}$ , for 1,5 RhAAC reaction pathways.

| $Cp^{CCl_3}$       |                           |                       |                            |                     |
|--------------------|---------------------------|-----------------------|----------------------------|---------------------|
|                    | $Go_{\text{GAS}}$         | $Eo_{\text{GAS}}$     | $Eo_{\text{Toluene}}$      | $Eo_{\text{THF}}$   |
| AC                 | 0.123480                  | -7697.305251          | -7697.309339               | -7697.311523        |
| RC <sub>1-5</sub>  | 0.249411                  | -8131.715868          | -8131.722189               | -8131.725655        |
| TS1 <sub>1-5</sub> | 0.250528                  | -8131.707171          | -8131.712731               | -8131.715744        |
| IC <sub>1-5</sub>  | 0.253221                  | -8131.732422          | -8131.741084               | -8131.746045        |
| TS2 <sub>1-5</sub> | 0.255477                  | -8131.726957          | -8131.734360               | -8131.738542        |
| P <sub>1-5</sub>   | 0.253767                  | -8131.822376          | -8131.836322               | -8131.844650        |
|                    | $Eo_{\text{Cyclohexane}}$ | $Eo_{\text{benzene}}$ | $Eo_{\text{Acetonitrile}}$ | $Eo_{\text{Water}}$ |
| AC                 | -7697.308789              | -7697.309197          | -7697.309197               | -7697.312490        |
| RC <sub>1-5</sub>  | -8131.721326              | -8131.721966          | -8131.721966               | -8131.727215        |
| TS1 <sub>1-5</sub> | -8131.711977              | -8131.712536          | -8131.712536               | -8131.717088        |
| IC <sub>1-5</sub>  | -8131.739875              | -8131.740770          | -8131.740770               | -8131.748339        |
| TS2 <sub>1-5</sub> | -8131.733335              | -8131.734094          | -8131.734094               | -8131.740461        |
| P <sub>1-5</sub>   | -8131.834335              | -8131.835805          | -8131.835805               | -8131.848607        |



Table S16.  $G_{\text{corr}}$  in the gas phase and ( $E_o$ ) in the solvent (in Hartree) of catalytic cycle components with  $Cp^{SO_3H}$ , for 1,5 RhAAC reaction pathways.

| $Cp^{SO_3H}$       |                            |                        |                             |                      |
|--------------------|----------------------------|------------------------|-----------------------------|----------------------|
|                    | $G_o_{\text{GAS}}$         | $E_o_{\text{GAS}}$     | $E_o_{\text{Toluene}}$      | $E_o_{\text{THF}}$   |
| AC                 | 0.214747                   | -3727.022047           | -3727.037250                | -3727.045527         |
| RC <sub>1-5</sub>  | 0.339582                   | -4161.455222           | -4161.469979                | -4161.478061         |
| TS1 <sub>1-5</sub> | 0.339190                   | -4161.439838           | -4161.453385                | -4161.460727         |
| IC <sub>1-5</sub>  | 0.341056                   | -4161.465382           | -4161.481155                | -4161.489943         |
| TS2 <sub>1-5</sub> | 0.344048                   | -4161.456414           | -4161.472588                | -4161.481635         |
| P <sub>1-5</sub>   | 0.346065                   | -4161.525034           | -4161.556004                | -4161.574344         |
|                    | $E_o_{\text{Cyclohexane}}$ | $E_o_{\text{benzene}}$ | $E_o_{\text{Acetonitrile}}$ | $E_o_{\text{Water}}$ |
| AC                 | -3727.035184               | -3727.036716           | -3727.036716                | -3727.049239         |
| RC <sub>1-5</sub>  | -4161.467967               | -4161.469458           | -4161.469458                | -4161.481698         |
| TS1 <sub>1-5</sub> | -4161.451549               | -4161.452911           | -4161.452911                | -4161.464017         |
| IC <sub>1-5</sub>  | -4161.478987               | -4161.480594           | -4161.480594                | -4161.493948         |
| TS2 <sub>1-5</sub> | -4161.470359               | -4161.472011           | -4161.472011                | -4161.485763         |
| P <sub>1-5</sub>   | -4161.551605               | -4161.554860           | -4161.554860                | -4161.582993         |

#### Atomic dipole-corrected Hirshfeld atomic charge (ADCH) for AC\_RhCp<sup>CF<sub>3</sub></sup>

Final atomic charges, after normalization to actual number of electrons

|               |             |
|---------------|-------------|
| Atom 1 (C ):  | -0.13877608 |
| Atom 2 (C ):  | -0.83828690 |
| Atom 3 (C ):  | -0.10303835 |
| Atom 4 (C ):  | 0.00864256  |
| Atom 5 (C ):  | 0.02062892  |
| Atom 6 (C ):  | 0.35980544  |
| Atom 7 (C ):  | 0.40270287  |
| Atom 8 (H ):  | 0.35051266  |
| Atom 9 (Rh):  | -0.37861630 |
| Atom 10 (C ): | 0.76779564  |
| Atom 11 (C ): | 0.85977128  |
| Atom 12 (C ): | 0.86199833  |
| Atom 13 (C ): | 0.85500632  |
| Atom 14 (C ): | 0.85881148  |
| Atom 15 (C ): | 0.00134304  |
| Atom 16 (C ): | -0.00445944 |
| Atom 17 (C ): | -0.08382596 |
| Atom 18 (C ): | -0.11655235 |
| Atom 19 (C ): | -0.13428521 |
| Atom 20 (C ): | -0.11443192 |
| Atom 21 (H ): | 0.08995164  |
| Atom 22 (H ): | 0.12809188  |
| Atom 23 (H ): | 0.12761050  |
| Atom 24 (H ): | 0.12494102  |
| Atom 25 (H ): | 0.12868419  |
| Atom 26 (F ): | -0.25740598 |
| Atom 27 (F ): | -0.25967537 |
| Atom 28 (F ): | -0.29078029 |

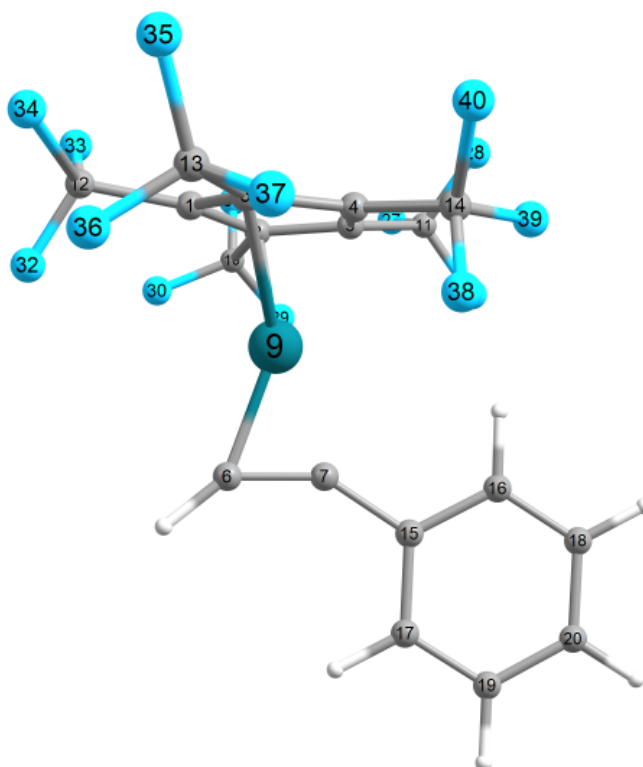

|      |         |             |
|------|---------|-------------|
| Atom | 29(F ): | -0.26786883 |
| Atom | 30(F ): | -0.25069786 |
| Atom | 31(F ): | -0.27215517 |
| Atom | 32(F ): | -0.26288537 |
| Atom | 33(F ): | -0.27807358 |
| Atom | 34(F ): | -0.27164439 |
| Atom | 35(F ): | -0.27991334 |
| Atom | 36(F ): | -0.27334803 |
| Atom | 37(F ): | -0.25649042 |
| Atom | 38(F ): | -0.27284230 |
| Atom | 39(F ): | -0.26086866 |
| Atom | 40(F ): | -0.27937564 |

### Atomic dipole-corrected Hirshfeld atomic charge (ADCH) for AC\_RhCp<sup>SiF<sub>3</sub></sup>

Final atomic charges, after normalization to actual number of electrons

|      |         |             |
|------|---------|-------------|
| Atom | 1(C ):  | -0.35313239 |
| Atom | 2(C ):  | -0.13220718 |
| Atom | 3(C ):  | 0.19501965  |
| Atom | 4(C ):  | -0.84032912 |
| Atom | 5(C ):  | -0.07522728 |
| Atom | 6(C ):  | -1.46045674 |
| Atom | 7(C ):  | 0.84826721  |
| Atom | 8(H ):  | 1.28069123  |
| Atom | 9(Rh):  | 1.64500754  |
| Atom | 10(Si): | 1.25811957  |
| Atom | 11(Si): | 1.32929231  |
| Atom | 12(Si): | 1.17954149  |
| Atom | 13(Si): | 1.28447158  |
| Atom | 14(Si): | 1.20407883  |
| Atom | 15(C ): | -0.53758875 |
| Atom | 16(C ): | 0.70513605  |
| Atom | 17(C ): | 0.61878764  |
| Atom | 18(C ): | -0.94924133 |
| Atom | 19(C ): | -0.92372217 |
| Atom | 20(C ): | -1.15758003 |
| Atom | 21(H ): | 0.05809190  |
| Atom | 22(H ): | 0.18556411  |
| Atom | 23(H ): | 0.06504828  |
| Atom | 24(H ): | 0.06129194  |
| Atom | 25(H ): | 0.08049813  |
| Atom | 26(F ): | -0.40355626 |
| Atom | 27(F ): | -0.36530624 |
| Atom | 28(F ): | -0.36693336 |
| Atom | 29(F ): | -0.41306342 |
| Atom | 30(F ): | -0.36333085 |
| Atom | 31(F ): | -0.34336268 |
| Atom | 32(F ): | -0.42068629 |
| Atom | 33(F ): | -0.32786223 |
| Atom | 34(F ): | -0.35400407 |
| Atom | 35(F ): | -0.35378350 |
| Atom | 36(F ): | -0.40813818 |
| Atom | 37(F ): | -0.35965292 |
| Atom | 38(F ): | -0.37142292 |

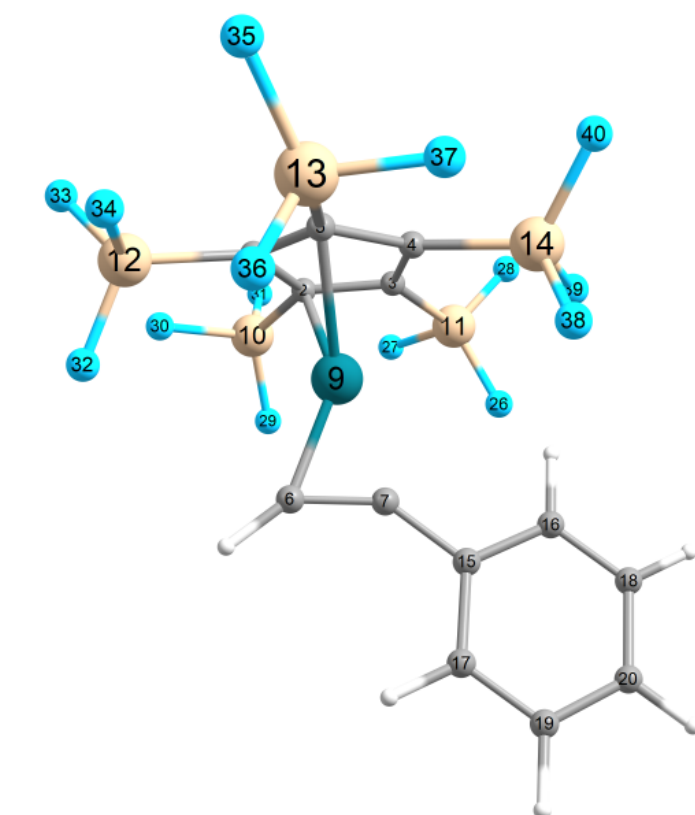

|      |         |             |
|------|---------|-------------|
| Atom | 39(F ): | -0.35284642 |
| Atom | 40(F ): | -0.36547312 |

### Atomic dipole-corrected Hirshfeld atomic charge (ADCH) for AC\_RhCp<sup>CCl<sub>3</sub></sup>

Final atomic charges, after normalization to actual number of electrons

|      |          |             |
|------|----------|-------------|
| Atom | 1 (C ):  | 0.03431694  |
| Atom | 2 (C ):  | 0.01527646  |
| Atom | 3 (C ):  | 0.80204182  |
| Atom | 4 (C ):  | -0.05960440 |
| Atom | 5 (C ):  | 0.04845414  |
| Atom | 6 (C ):  | -2.45778773 |
| Atom | 7 (C ):  | -0.56517972 |
| Atom | 8 (H ):  | 1.18511203  |
| Atom | 9 (Rh):  | 0.73297537  |
| Atom | 10 (C ): | 0.40824468  |
| Atom | 11 (C ): | 0.52544225  |
| Atom | 12 (C ): | 0.48182525  |
| Atom | 13 (C ): | 0.49261240  |
| Atom | 14 (C ): | 0.43631702  |
| Atom | 15 (C ): | 0.19132315  |
| Atom | 16 (C ): | -0.00172925 |
| Atom | 17 (C ): | -0.05804412 |
| Atom | 18 (C ): | -0.20868048 |
| Atom | 19 (C ): | -0.12528259 |
| Atom | 20 (C ): | -0.08002211 |
| Atom | 21 (H ): | 0.11597193  |
| Atom | 22 (H ): | 0.11388689  |
| Atom | 23 (H ): | 0.11151300  |
| Atom | 24 (H ): | 0.12332566  |
| Atom | 25 (H ): | 0.12622935  |
| Atom | 26 (Cl): | -0.15408524 |
| Atom | 27 (Cl): | -0.16584706 |
| Atom | 28 (Cl): | -0.15962244 |
| Atom | 29 (Cl): | -0.16149946 |
| Atom | 30 (Cl): | -0.16899776 |
| Atom | 31 (Cl): | -0.14593820 |
| Atom | 32 (Cl): | -0.14906091 |
| Atom | 33 (Cl): | -0.15783611 |
| Atom | 34 (Cl): | -0.16848856 |
| Atom | 35 (Cl): | -0.17375217 |
| Atom | 36 (Cl): | -0.15071426 |
| Atom | 37 (Cl): | -0.15327763 |
| Atom | 38 (Cl): | -0.17673628 |
| Atom | 39 (Cl): | -0.14233260 |
| Atom | 40 (Cl): | -0.16034925 |

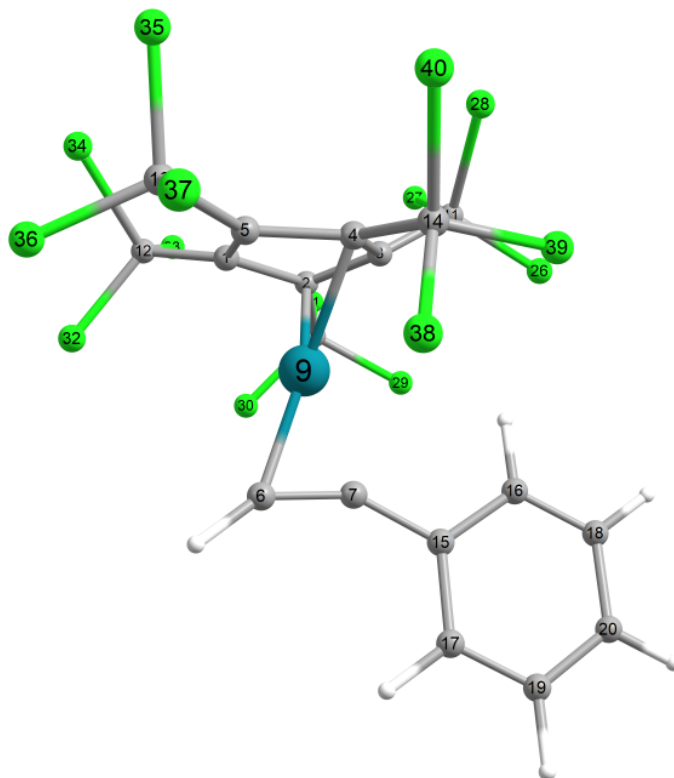

### Atomic dipole-corrected Hirshfeld atomic charge (ADCH) for AC\_RhCp<sup>CCl<sub>3</sub></sup>

Final atomic charges, after normalization to actual number of electrons

|      |         |             |
|------|---------|-------------|
| Atom | 1 (C ): | -0.05389813 |
| Atom | 2 (C ): | 0.11102669  |
| Atom | 3 (C ): | 0.10987707  |
| Atom | 4 (C ): | -0.02300907 |
| Atom | 5 (C ): | -0.71596812 |
| Atom | 6 (C ): | 0.89008089  |
| Atom | 7 (C ): | 0.47634172  |
| Atom | 8 (H ): | 0.00372840  |

|      |           |             |
|------|-----------|-------------|
| Atom | 9 (Rh) :  | -0.62678539 |
| Atom | 10 (C ) : | -0.74520140 |
| Atom | 11 (C ) : | -0.07931828 |
| Atom | 12 (C ) : | -0.23111499 |
| Atom | 13 (C ) : | -0.10759316 |
| Atom | 14 (C ) : | -0.08661500 |
| Atom | 15 (C ) : | 0.77326173  |
| Atom | 16 (H ) : | 0.03637897  |
| Atom | 17 (H ) : | 0.13792285  |
| Atom | 18 (H ) : | 0.11098251  |
| Atom | 19 (H ) : | 0.10919829  |
| Atom | 20 (H ) : | 0.16584611  |
| Atom | 21 (S ) : | 1.92921375  |
| Atom | 22 (O ) : | -0.64236778 |
| Atom | 23 (O ) : | -0.92974581 |
| Atom | 24 (S ) : | 1.84771787  |
| Atom | 25 (O ) : | -0.90675447 |
| Atom | 26 (O ) : | -0.62233000 |
| Atom | 27 (S ) : | 1.91285154  |
| Atom | 28 (O ) : | -0.93126210 |
| Atom | 29 (O ) : | -0.90583952 |
| Atom | 30 (S ) : | 1.93615317  |
| Atom | 31 (O ) : | -0.94422224 |
| Atom | 32 (O ) : | -0.91883949 |
| Atom | 33 (S ) : | 1.92095347  |
| Atom | 34 (O ) : | -0.63104418 |
| Atom | 35 (O ) : | -0.93029403 |
| Atom | 36 (O ) : | -0.62635723 |
| Atom | 37 (O ) : | -0.62490680 |
| Atom | 38 (O ) : | -0.90247394 |
| Atom | 39 (O ) : | -0.89645793 |
| Atom | 40 (O ) : | -0.93256657 |
| Atom | 41 (H ) : | 0.51616831  |
| Atom | 42 (H ) : | 0.50444725  |
| Atom | 43 (H ) : | 0.51169596  |
| Atom | 44 (H ) : | 0.50248198  |
| Atom | 45 (H ) : | 0.50863709  |

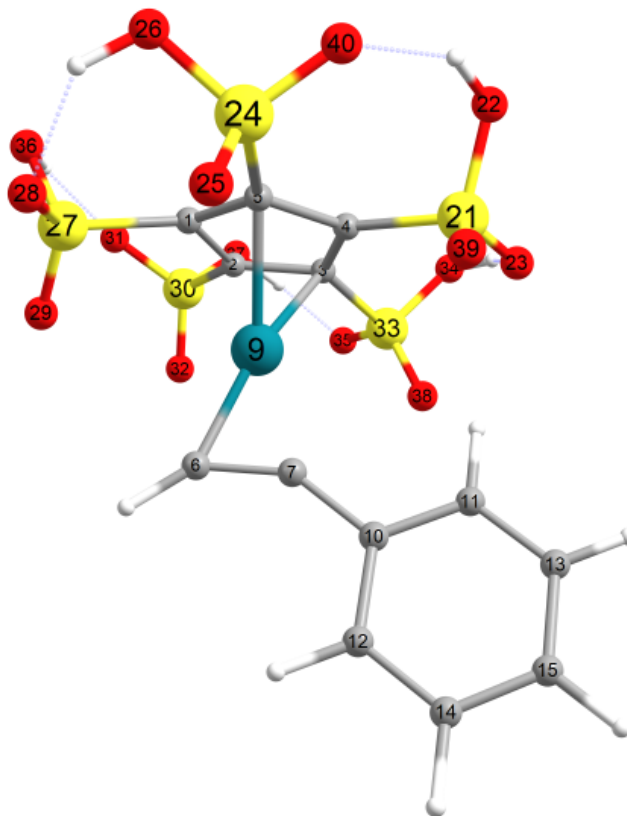

Supplement: d4dt02970d2.pdf [file d4dt02970d2.pdf]
